# Supplementary material for: Practice makes perfect? Experience boosts foraging performance in a ponerine ant
Source: Research Square preprint supplement (doi:10.21203/rs.3.rs-7302949/v1), 2025-08-29
Supplement: Supplementary file 1 [file 4c86a0714e164ac6d8024d69.pdf]

Practice makes perfect? Experience boosts foraging performance in a ponerine ant

Supplementary material

Table S1. Demographic information of different colonies at the beginning of the experiments.

| Colony Identities | Workers |
|-------------------|---------|
| 2                 | 77      |
| 4                 | 122     |
| 6.1               | 68      |
| 6.2               | 55      |
| 7                 | 90      |
| 8                 | 76      |

(a)

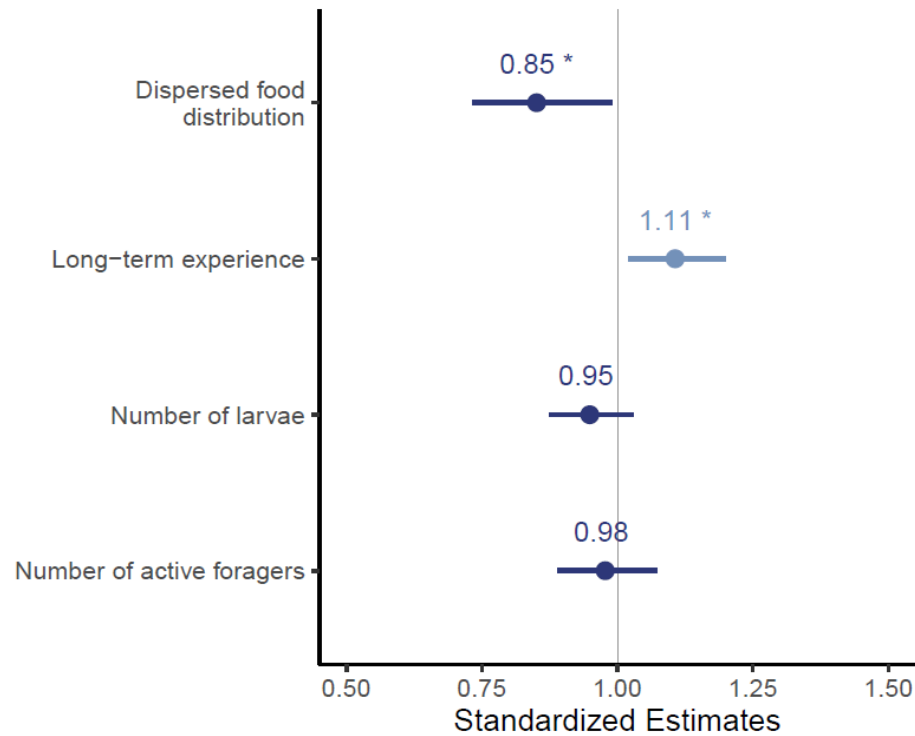

(b)

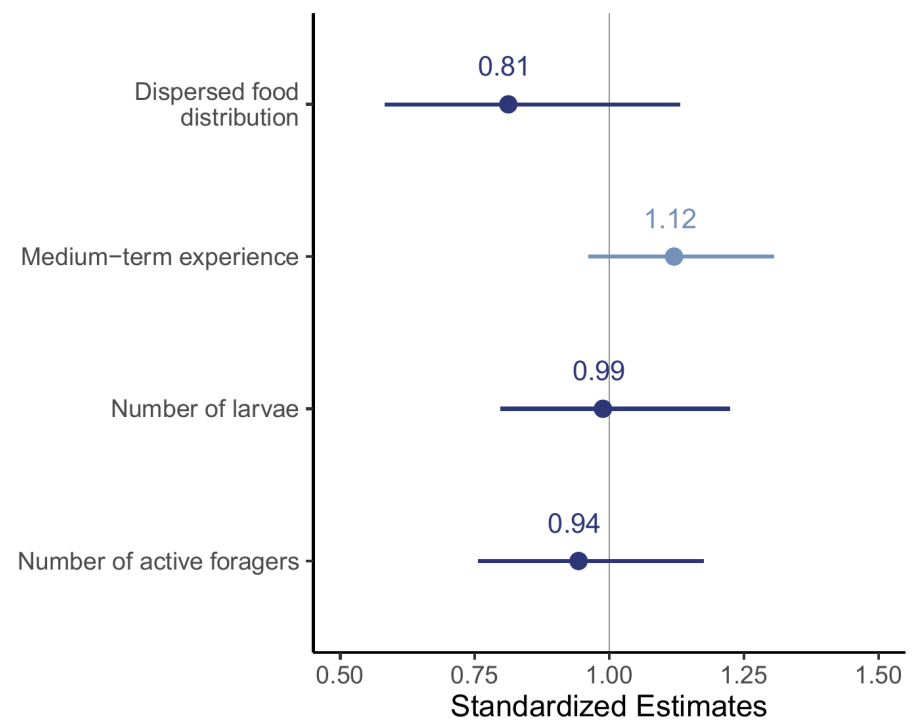

**Figure S1.** Standardised estimates coefficients with 95% confidence intervals and significance ( $p \geq 0.05$ : none,  $p < 0.05^*$ ,  $p < 0.01^{**}$ ,  $p < 0.001^{***}$ ) of the foraging activity models. Positive coefficients are represented in light blue and negative ones in dark blue. (a) GLMM for Poisson distribution with activity as the response variable and long-term experience as a fixed variable ( $N = 431$  foragers/day). (b) GLMM for Poisson distribution with activity as the response variable and medium-term experience as a fixed variable ( $N = 84$  foragers in paired trials).

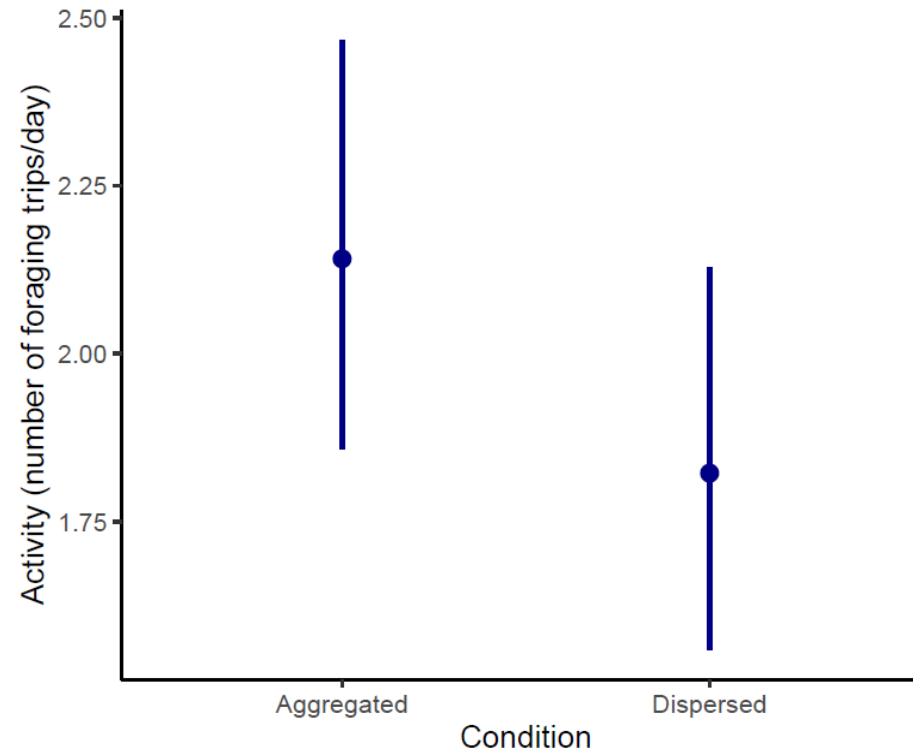

**Fig S2.** Predicted effects (with 95% confidence intervals) of food distribution (N aggregated = 216, N dispersed = 215) on the foraging activity of *P. striata*.

(a)

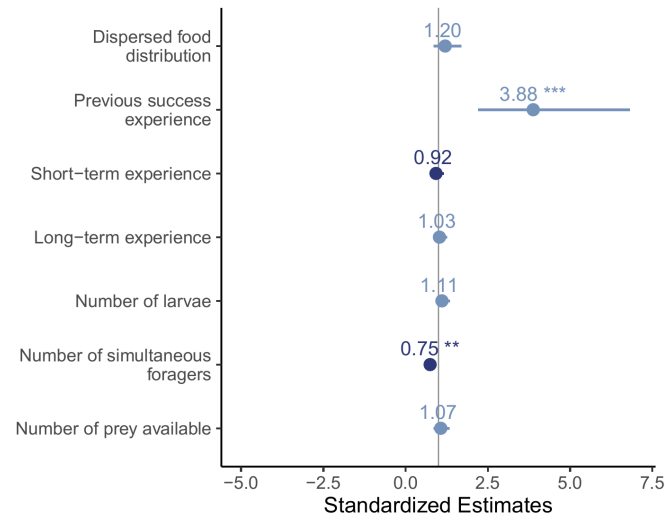

(b)

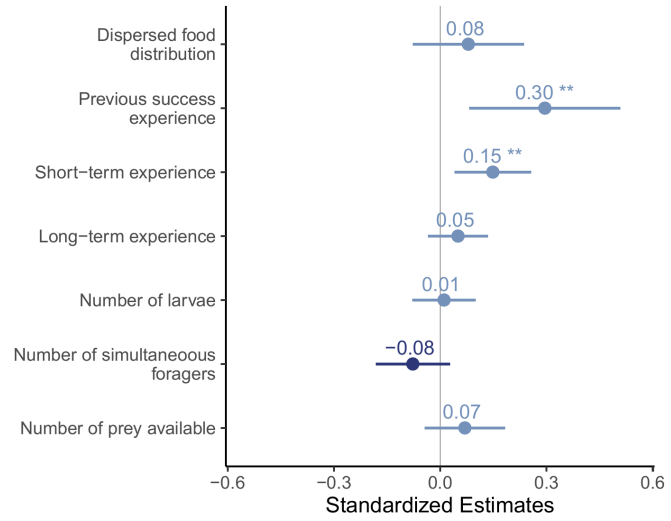

(c)

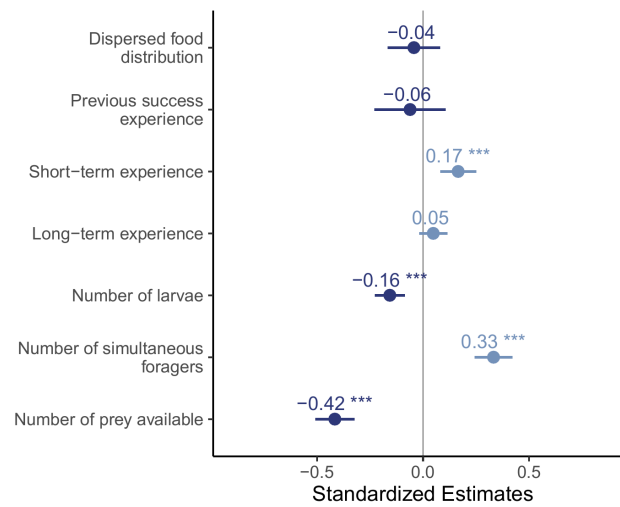

**Figure S3.** Standardised estimates coefficients with 95% confidence intervals and significance ( $p \geq 0.05$ : none,  $p < 0.05^*$ ,  $p < 0.01^{**}$ ,  $p < 0.001^{***}$ ) of the exploration models. Positive coefficients are represented in light blue and negative ones in dark blue. (a) GLMM for binomial distribution with exploration (yes/no) as the response variable (N = 875 foraging trips). (b) LMM with exploration rate as the response variable (N = 646 foraging trips). (c) LMM with latency to start exploration as the response variable (N = 646 foraging trips).

(a)

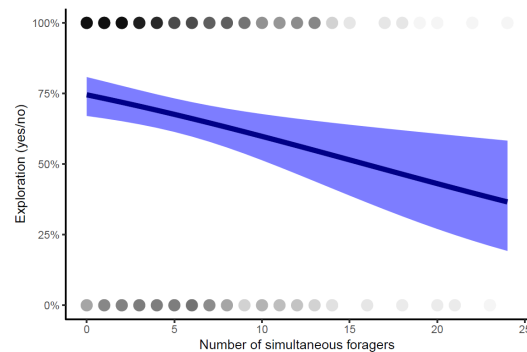

(b)

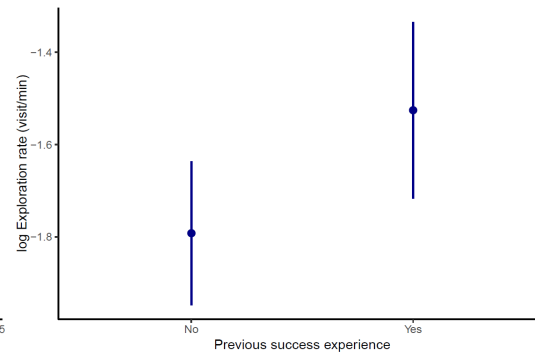

(c)

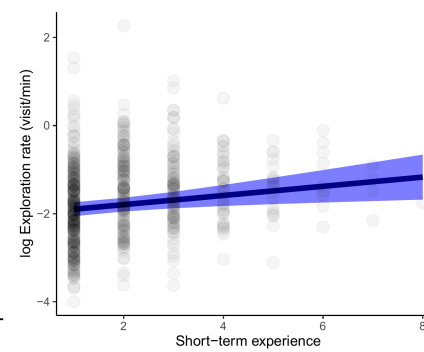

(d)

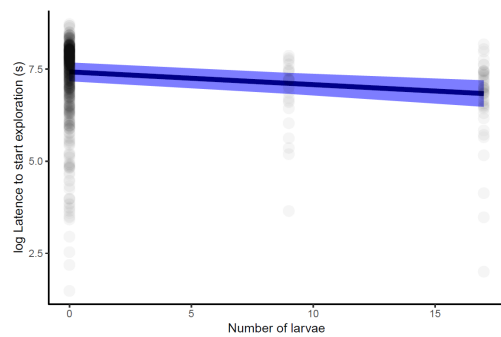

(e)

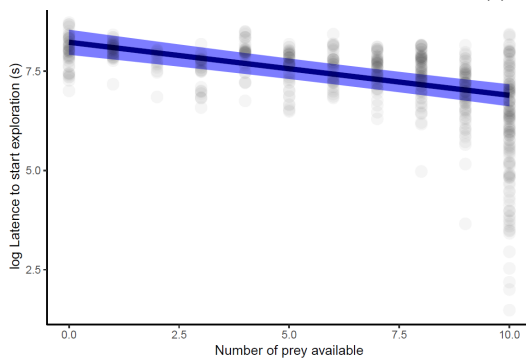

(f)

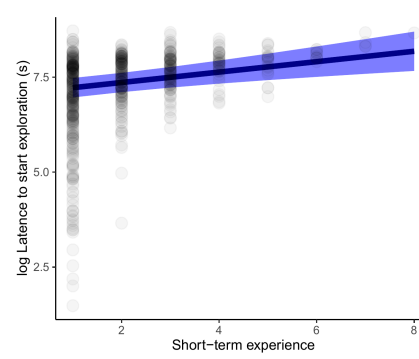

(g)

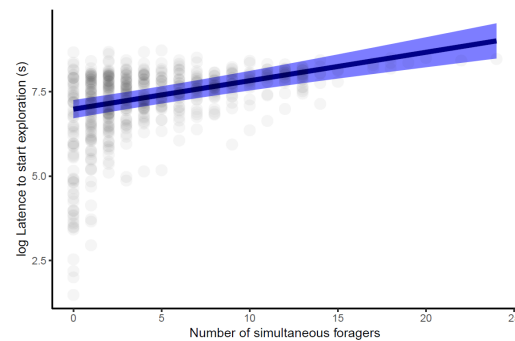

**Figure S4.** Predicted effects (with 95% confidence intervals) of external and internal variables on the exploratory behaviour of *P. striata* foragers. (a) Effect of the number of foragers on the propensity to explore. Effect of (b) previous success experience (N 'no' = 434, N 'yes' = 212) and (c) same-day experience on the log-transformed exploration rates. Effect of (d) number of larvae, (e) number of prey available, (f) same-day experience and (g) number of simultaneous foragers on the log-transformed latency to explore.

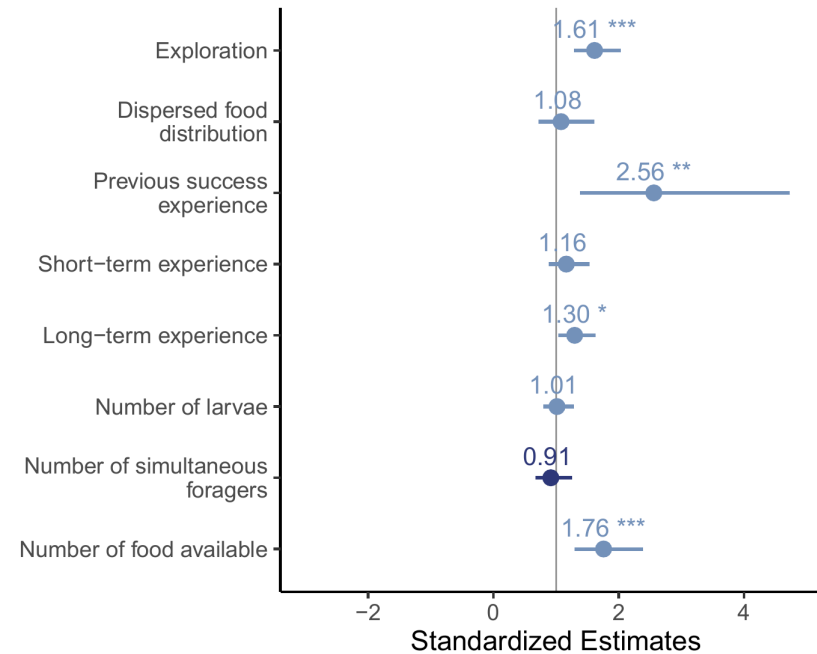

**Figure S5.** Standardised estimates coefficients with 95% confidence intervals and significance ( $p \geq 0.05$ : none,  $p < 0.05^*$ ,  $p < 0.01^{**}$ ,  $p < 0.001^{***}$ ) of the GLMM for binomial distribution with foraging success as the response variable (N = 618 foraging trips). Positive coefficients are represented in light blue and negative ones in dark blue.

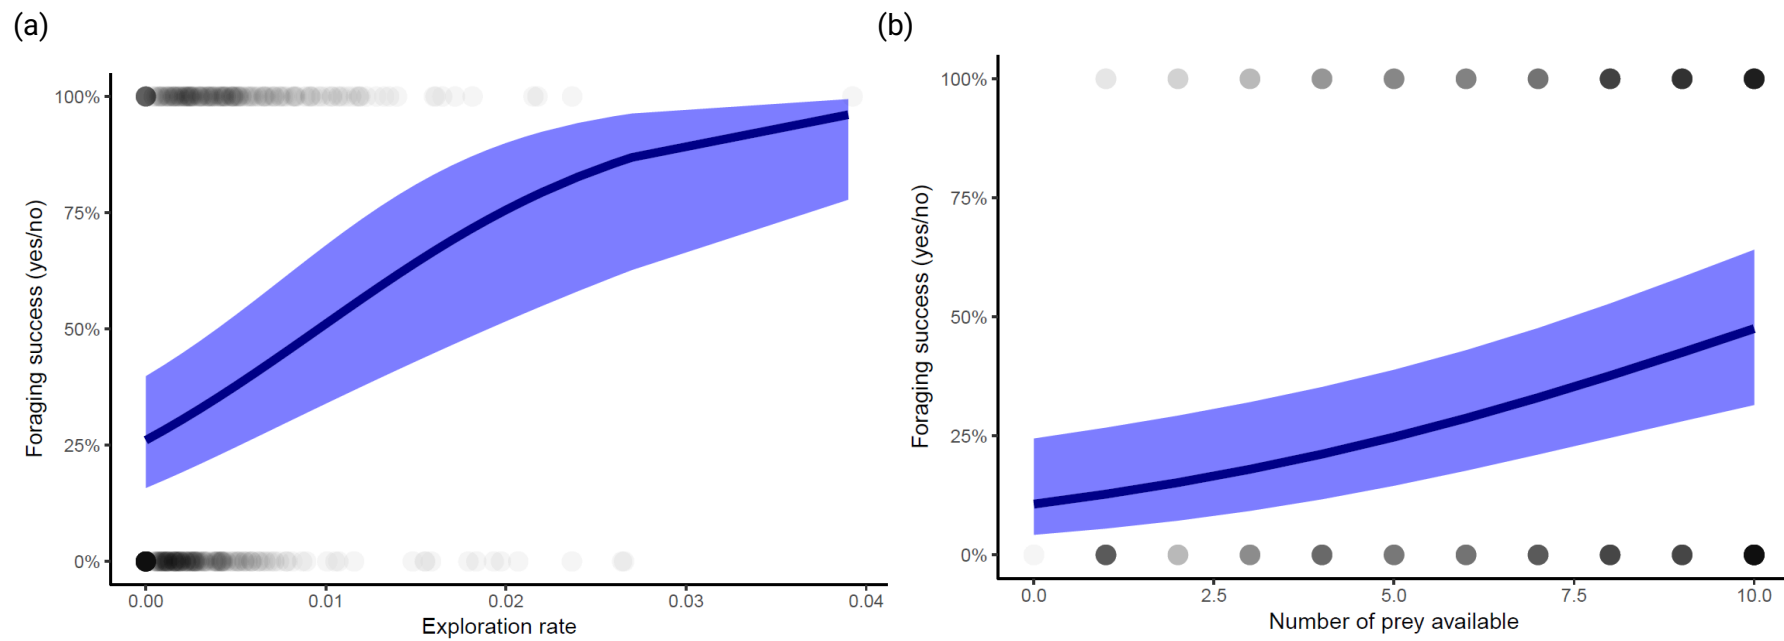

**Figure S6.** Predicted effects (with 95% confidence intervals) of exploration (a) and number of prey available (b) on the foraging success of *P. striata*.
